# Supplementary material
Source: Springer Nature journal article supplement (https://www.springermedizin.de/resource/supplementary/12913_2013_3197_MOESM1_ESM.pdf/9532668)

Number of patients attending

ABM Clinic

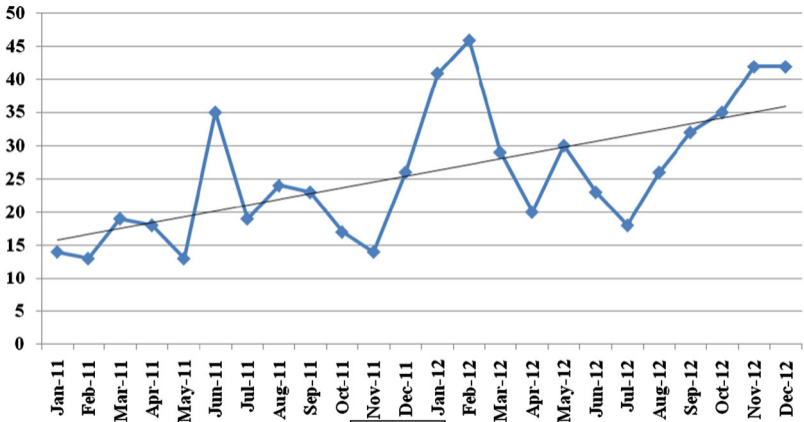

Period

Supplement: MOESM1 [file 9532668]
